# Supplementary material for: An insight into the sodium-ion and lithium-ion storage properties of CuS/graphitic carbon nitride nanocomposite
Source: Royal Society of Chemistry journal article supplement (doi:10.1039/d2ra02014a), 2022-01-01
Supplement: d2ra02014a1.pdf [file d2ra02014a1.pdf]

## Supplementary Information

### An insight into the sodium-ion and lithium-ion storage properties of CuS/graphitic carbon nitride nanocomposite

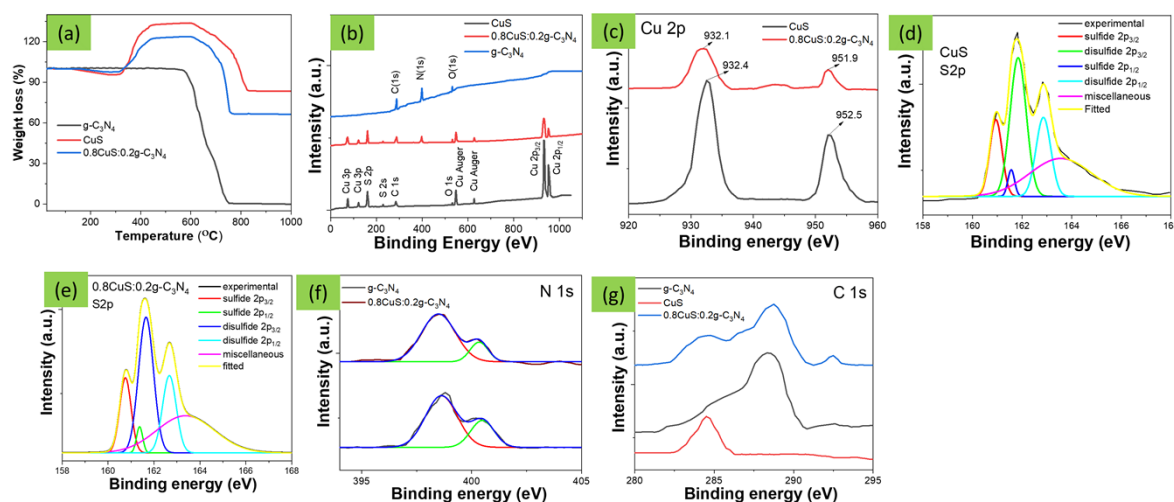

**Figure S1:** a) TG, b) XPS survey spectra of g-C<sub>3</sub>N<sub>4</sub>, CuS, 0.8CuS:0.2g-C<sub>3</sub>N<sub>4</sub>; c) high resolution Cu2p spectrum of CuS and 0.8CuS:0.2g-C<sub>3</sub>N<sub>4</sub>; Fitted high resolution d) S2p XPS of CuS; e) S2p XPS of 0.8CuS:0.2g-C<sub>3</sub>N<sub>4</sub>; f) N1s XPS of CuS and 0.8CuS:0.2g-C<sub>3</sub>N<sub>4</sub>; g) high resolution C1s of g-C<sub>3</sub>N<sub>4</sub>, CuS, 0.8CuS:0.2g-C<sub>3</sub>N<sub>4</sub>.

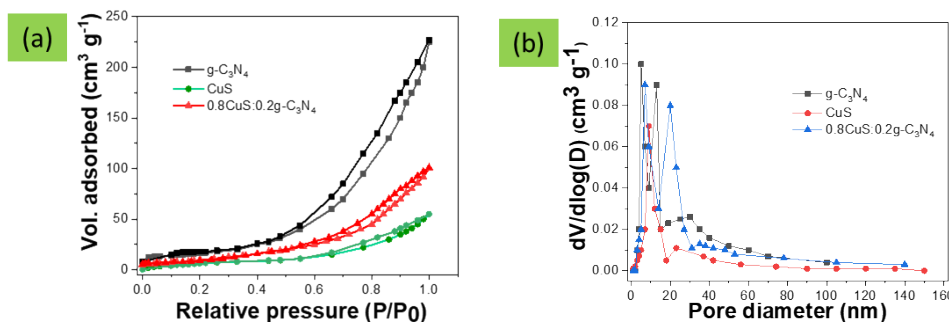

**Figure S2:** a) BET isotherm and b) BJH pore size distribution plot of g-C<sub>3</sub>N<sub>4</sub>, CuS, 0.8CuS:0.2g-C<sub>3</sub>N<sub>4</sub>

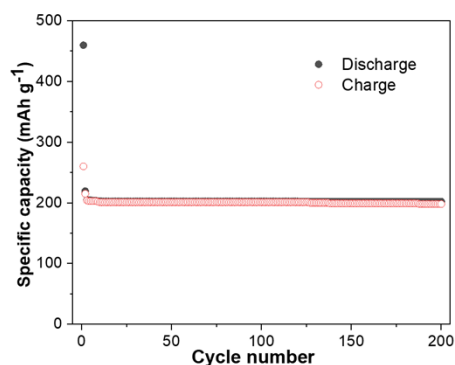

**Figure S3:** Specific capacity of g-C<sub>3</sub>N<sub>4</sub> anode at 0.1 A g<sup>-1</sup> current rate in LIB mode

**Table S1:** Comparison of CuS anode (in this work) with that reported in literature (for LIBs).

| Ref.             | Synthesis method | Cycling performance                             |                                                                                   |               |
|------------------|------------------|-------------------------------------------------|-----------------------------------------------------------------------------------|---------------|
|                  |                  | Initial discharge/charge (mAh g <sup>-1</sup> ) | Reversible capacity (mAh g <sup>-1</sup> ) / current density (A g <sup>-1</sup> ) | No. of cycles |
| 1                | Hydrothermal     | 525/311                                         | 50 / 0.05                                                                         | 10            |
| 2                | Co-precipitation | 708/570                                         | 400 / 0.25                                                                        | 100           |
| 3                | Sol-gel          | 775/561                                         | 390 / 0.11                                                                        | 250           |
| 4                | Liquid phase     | 1380/850                                        | 259 / 0.1                                                                         | 50            |
| 5                | Microwave        | 505/450                                         | 379 / 0.2                                                                         | 100           |
| 6                | Hydrothermal     | 690/500                                         | 203 / 0.1                                                                         | 100           |
| <b>This work</b> | Co-precipitation | 930/693                                         | 304 / 0.1                                                                         | 200           |

1. Tao, H.-C.; Yang, X.-L.; Zhang, L.-L.; Ni, S.-B. One-pot facile synthesis of CuS/graphene composite as anode materials for lithium ion batteries. *J. Phys. Chem. Solids* **2014**, *75*, 1205–1209.
2. Feng, C.; Zhang, L.; Yang, M.; Song, X.; Zhao, H.; Jia, Z.; Sun, K.; Liu, G. One-pot synthesis of copper sulfide nanowires/reduced graphene oxide nanocomposites with excellent lithium-storage properties as anode materials for lithium-ion batteries. *ACS Appl. Mater. Interfaces* **2015**, *7*, 15726–15734.
3. Zhou, M.; Peng, N.; Liu, Z.; Xi, Y.; He, H.; Xi, Y.; Liu, Z.; Okada, S. Synthesis of sub-10 nm copper sulphide rods as high-performance anode for long-cycle life Li-ion batteries. *J. Power Sources* **2016**, *306*, 408-412.
4. Liu, H.; Zhang, L.; Ruan, H. Flower-like CuS/reduced graphene oxide composite as anode materials for lithium ion batteries. *Int. J. Electrochem. Sci.* **2018**, *13*, 4775 – 4781.
5. Li, H.; Wang, Y.; Huang, J.; Zhang, Y.; Zhao, J. Microwave-assisted synthesis of CuS/graphene composite for enhanced lithium storage properties. *Electrochim. Acta* **2017**, *225*, 443–451

6. Zhang, J.; Zhao, Y.; Zhang, Y.; Li, J.; Babaa, M.-R.; Liu, N.; Bakenov, Z. Synthesis of microflower-like vacancy defective copper sulfide/reduced graphene oxide composites for highly efficient lithium-ion batteries. *Nanotechnology* **2020**, *31*, 095405 (6pp)

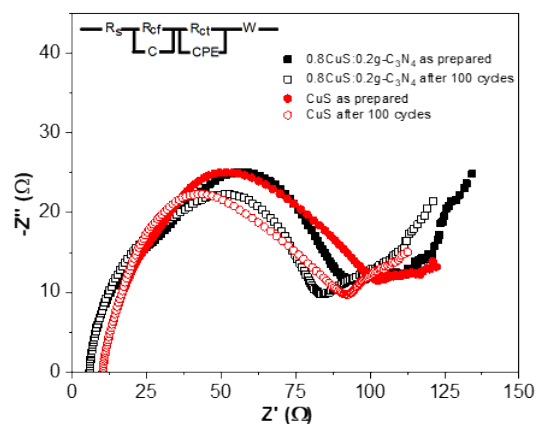

**Figure S4:** Nyquist plot of as prepared and after 100 cycle run of CuS and 0.8CuS:0.2g-C<sub>3</sub>N<sub>4</sub> electrode.

**Table S2:** Electrochemical performance of CuS based composite LIB anodes reported in literature.

| Ref.             | Sample                              | Cycling performance                             |         |                                                                                   |               | Rate performance                                                                  |
|------------------|-------------------------------------|-------------------------------------------------|---------|-----------------------------------------------------------------------------------|---------------|-----------------------------------------------------------------------------------|
|                  |                                     | Initial discharge/charge (mAh g <sup>-1</sup> ) | ICE (%) | Reversible capacity (mAh g <sup>-1</sup> ) / current density (A g <sup>-1</sup> ) | No. of cycles | Reversible capacity (mAh g <sup>-1</sup> ) / current density (A g <sup>-1</sup> ) |
| 1                | CuS/graphene                        | 827/484                                         | 58.5    | 296/0.05                                                                          | 25            | ---/--                                                                            |
| 2                | CuS nanowires/rGO                   | 908/630                                         | 69.4    | 620/0.28                                                                          | 100           | 300/2.8                                                                           |
| 3                | CuS/PANI/graphene                   | 1655/1266                                       | 76.5    | 1265/0.1                                                                          | 250           | 374/5                                                                             |
| 4                | CuS/rGO                             | 1236/658                                        | 53.2    | 399/0.1                                                                           | 50            | 608/1.6                                                                           |
| 5                | CuS/Cu <sub>1.8</sub> S             | 1130/707                                        | 62.5    | 450/0.26                                                                          | 1000          | 195/0.8                                                                           |
| 6                | CuS/graphene                        | 627/525                                         | 83.7    | 348/2                                                                             | 1000          | 370/4                                                                             |
| 7                | FeS <sub>2</sub> /CuS               | 1394/999                                        | 71.7    | 843.3/1.0                                                                         | 600           | 530.4/10                                                                          |
| 8                | CuS/rGO                             | 882/670                                         | 75.9    | 585/0.11                                                                          | 100           | 150/1.6                                                                           |
| <b>This work</b> | CuS/g-C <sub>3</sub> N <sub>4</sub> | 981/855                                         | 87.2    | 552 /1.0                                                                          | 1000          | 478.4/2                                                                           |

1. Tao, H.-C.; Yang, X.-L.; Zhang, L.-L.; Ni, S.-B. One-pot facile synthesis of CuS/graphene composite as anode materials for lithium ion batteries. *J. Phys. Chem. Solids* **2014**, *75*, 1205–1209.

- Feng, C.; Zhang, L.; Yang, M.; Song, X.; Zhao, H.; Jia, Z.; Sun, K.; Liu, G. One-pot synthesis of copper sulfide nanowires/reduced graphene oxide nanocomposites with excellent lithium-storage properties as anode materials for lithium-ion batteries. *ACS Appl. Mater. Interfaces* **2015**, *7*, 15726–15734.
- Iqbal, S.; Bahadur, A.; Saeed, A.; Zhou, K.; Shoaib, M.; Waqas, M. Electrochemical performance of 2D polyaniline anchored CuS/Graphene nano-active composite as anode material for lithium-ion battery. *J. Colloid Inter. Sci.* **2017**, *502*, 16–23.
- Liu, H.; Zhang, L.; Ruan, H. Flower-like CuS/reduced Graphene Oxide composite as anode materials for lithium ion batteries. *Int. J. Electrochem. Sci.* **2018**, *13*, 4775 – 4781.
- Wang, L.-H.; Dai, Y.-K.; Qin, Y.-F.; Chen, J.; Zhou, E.-L.; Li, Q.; Wang, K. One-Pot synthesis and high electrochemical performance of CuS/Cu<sub>1.8</sub>S nanocomposites as anodes for Lithium-ion batteries. *Materials* **2020**, *13*, 3797.
- Li, H.; Wang, Y.; Huang, J.; Zhang, Y.; Zhao, J. Microwave-assisted synthesis of CuS/graphene composite for enhanced lithium storage properties. *Electrochim. Acta* **2017**, *225*, 443–451.
- Xu, X.; Li, L.; Chen, H.; Guo, X.; Zhang, Z.; Liu, J.; Mao, C.; Li, G. Constructing heterostructured FeS<sub>2</sub>/CuS nanospheres as high rate performance lithium ion battery anodes. *Inorg. Chem. Front.* **2020**, *7*, 1900
- Zhang, J.; Zhao, Y.; Zhang, Y.; Li, J.; Babaa, M.-R.; Liu, N.; Bakenov, Z. Synthesis of microflower-like vacancy defective copper sulfide/reduced graphene oxide composites for highly efficient lithium ion batteries. *Nanotechnology* **2020**, *31*, 095405 (6pp)

**Table S3:** Comparison of CuS anode (in this work) with that reported in literature (for SIBs).

| Ref.        | Synthesis method          | Cycling performance                             |         |                                                                                   |               |
|-------------|---------------------------|-------------------------------------------------|---------|-----------------------------------------------------------------------------------|---------------|
|             |                           | Initial discharge/charge (mAh g <sup>-1</sup> ) | ICE (%) | Reversible capacity (mAh g <sup>-1</sup> ) / current density (A g <sup>-1</sup> ) | No. of cycles |
| 1           | Microwave                 | 440/400                                         | 90.9    | 311.8 / 0.1                                                                       | 50            |
| 2           | Solvothermal              | 700/550                                         | 78.6    | 300 / 0.2                                                                         | 100           |
| 3           | Hydrothermal              | ---/400                                         | ---     | 150 / 1.0                                                                         | 100           |
| 4           | Dealloying                | 484/444                                         | 91.7    | 132.6 / 5.0                                                                       | 5000          |
| 5           | Thermal                   | 640/555                                         | 86.7    | 517 / 5.0                                                                         | 2000          |
| 6           | Hydrothermal ion exchange | 456.9/418.6                                     | 91.6    | 418.6 / 0.1                                                                       | 100           |
| <b>This</b> | Co-                       | 738/635                                         | 86.0    | 212/1.0                                                                           | 800           |

|      |               |  |  |  |  |
|------|---------------|--|--|--|--|
| work | precipitation |  |  |  |  |
|------|---------------|--|--|--|--|

1. Li, J.; Yan, D.; Lu, T.; Qin, W.; Yao, Y.; Pan, L. Significantly improved sodium-ion storage performance of CuS nanosheets anchored into reduced graphene oxide with ether-based electrolyte. *ACS Appl. Mater. Interfaces* **2017**, *9*, 2309–2316.
2. Kim, N. R.; Choi, J.; Yoon, H. J.; Lee, M. E.; Son, S. U.; Jin, H.-J.; Yun, Y. S. Conversion reaction of copper sulfide based nanohybrids for sodium-ion batteries. *ACS Sustainable Chem. Eng.* **2017**, *5*, 9802-9808.
3. Xiao, Y.; Su, D.; Wang, X.; Wu, S.; Zhou, L.; Shi, Y.; Fang, S.; Cheng, H.-M.; Li, F. CuS microspheres with tunable interlayer space and micropore as a high-rate and long-life anode for sodium-ion batteries. *Adv. Energy Mater.* **2018**, *8*, 1800930.
4. An, C.; Ni, Y.; Wang, Z.; Li, X.; Liu, X. Facile fabrication of CuS microflower as a highly durable sodium-ion battery anode. *Inorg. Chem. Front.* **2018**, *5*, 1045
5. Kim, H.; Sadan, M. K.; Kim, C.; Choe, S.-H.; Cho, K.-K.; Kim, K.-W.; Ahn, J.-H.; Ahn, H.-J. Simple and scalable synthesis of CuS as an ultrafast and long-cycling anode for sodium ion batteries. *J. Mater. Chem. A* **2019**, *7*, 16239–16248.
6. Wu, L.; Gao, J.; Qin, Z.; Sun, Y.; Tian, R.; Zhang, Q.; Gao, Y. Deactivated-desulfurizer-derived hollow copper sulfide as anode materials for advanced sodium ion batteries. *J. Power Sources* **2020**, *479*, 228518

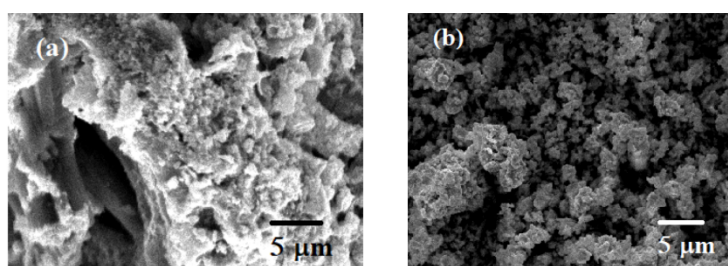

**Figure S5:** SEM of a) CuS electrode; b) 0.8CuS:0.2g-C<sub>3</sub>N<sub>4</sub> composite electrode after 800 cycle run in SIB mode.

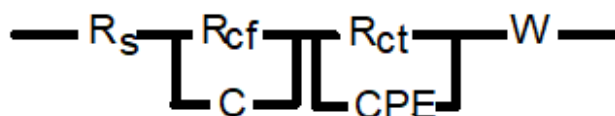

**Figure S6:** Equivalent circuit diagram for Nyquist plot for as prepared and after run of 100 cycles of CuS and 0.8CuS:0.2g-C<sub>3</sub>N<sub>4</sub> composite electrode in SIB mode.

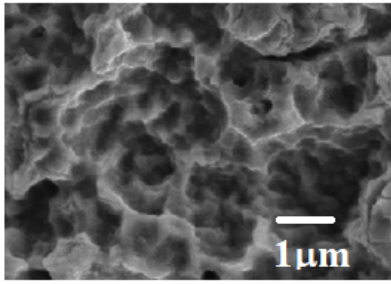

**Figure S7:** SEM of Cu current collector after 800 cycle run (anode material removed)

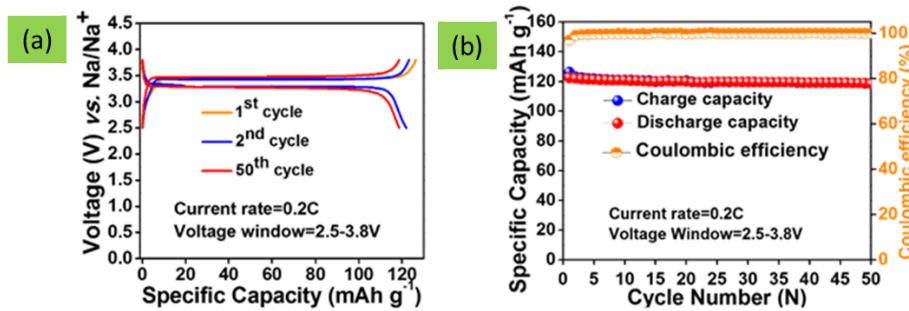

**Figure S8:** (a) GDC performance of NVP, (b) Cycling performance of NVP at 0.5C; potential range from 2.5 to 3.8 V vs. Na/Na<sup>+</sup>. NVP has been synthesized using the procedure as described in our earlier work [Carbon 143 (2019) 402-412]. The NVP electrodes were prepared by casting a slurry of NVP: Super C-65 (Timcal): Polyvinylidene fluoride (PVDF) in 8:1:1 weight ratio in N-Methyl-2- pyrrolidone (NMP) medium onto Al foil (16 mm). The electrodes were dried in vacuum at 100°C for about 8 h, and the half cell was assembled in an Ar-filled glove box, where both moisture and oxygen levels were kept at less than 1 ppm. 1 M NaClO<sub>4</sub> in a mixture of ethylene carbonate (EC), propylene carbonate (PC) (1:1 v/v) and fluoroethylene carbonate (FEC) (3 wt%) was used as the electrolyte, and a porous borosilicate glass fiber (GF/D, Whatman) was used as a separator.

**Table S4:** Electrochemical performance of CuS based composite SIB anodes reported in literature.

| Ref. | Sample                  | Cycling performance                             |         |                                                                                   | Rate performance |                                                                                   |
|------|-------------------------|-------------------------------------------------|---------|-----------------------------------------------------------------------------------|------------------|-----------------------------------------------------------------------------------|
|      |                         | Initial discharge/charge (mAh g <sup>-1</sup> ) | ICE (%) | Reversible capacity (mAh g <sup>-1</sup> ) / current density (A g <sup>-1</sup> ) | No. of cycles    | Reversible capacity (mAh g <sup>-1</sup> ) / current density (A g <sup>-1</sup> ) |
| 1    | CuS/rGO                 | 780/550 (NaClO <sub>4</sub> /FEP, 0.005–3.0 V)  | 70.5    | 392.9/0.1                                                                         | 50               | 359.5/1.0                                                                         |
| 2    | CuS /a-SWCNT            | 710/600                                         | 84.5    | 410/0.1                                                                           | 500              | 315/3.0                                                                           |
| 3    | CuS/CTAB                | 747.5/ 684.9                                    | 91.6    | 312.5/10                                                                          | 1000             | 21.1/40                                                                           |
| 4    | Cu <sub>1.8</sub> S-C/C | 380/350                                         | 92.1    | 372/0.05                                                                          | 110              | 286/2.8                                                                           |

|                  |                                     |             |      |          |      |          |
|------------------|-------------------------------------|-------------|------|----------|------|----------|
|                  | core/shell                          |             |      |          |      |          |
| 5                | CuS <sub>x</sub> @C                 | 555.4/369.3 | 66.5 | 208/2    | 6300 | 133.2/10 |
| <b>This work</b> | CuS/g-C <sub>3</sub> N <sub>4</sub> | 755/695     | 92.1 | 424 /1.0 | 800  | 408/2.0  |

1. Li, J.; Yan, D.; Lu, T.; Qin, W.; Yao, Y.; Pan, L. Significantly improved sodium-ion storage performance of CuS nanosheets anchored into reduced graphene oxide with ether-based electrolyte. *ACS Appl. Mater. Interfaces* **2017**, *9*, 2309–2316.
2. Kim, N. R.; Choi, J.; Yoon, H. J.; Lee, M. E.; Son, S. U.; Jin, H.-J.; Yun, Y. S. Conversion reaction of copper sulfide based nanohybrids for sodium-ion batteries. *ACS Sustainable Chem. Eng.* **2017**, *5*, 9802-9808.
3. Xiao, Y.; Su, D.; Wang, X.; Wu, S.; Zhou, L.; Shi, Y.; Fang, S.; Cheng, H.-M.; Li, F. CuS microspheres with tunable interlayer space and micropore as a high-rate and long-life anode for sodium-ion batteries. *Adv. Energy Mater.* **2018**, *8*, 1800930.
4. Kang, C.; Lee, Y.; Kim, I.; Hyun, S.; Lee, T. H.; Yun, S.; Yoon, W.-S.; Moon, Y.; Lee, J.; Kim, S.; Lee, H.-J. Highly efficient nanocarbon coating layer on the nanostructured copper sulfide-metal organic framework derived carbon for advanced sodium-ion battery anode, *Materials* **2019**, *12(8)*, 1324.
5. Shuang, W.; Huang, H.; Liu, M.; Bai, T.; Zhang, J.; Wang, D. Engineering of CuS<sub>x</sub>@C derived from Cu-MOF as long-life anodes for sodium-ion batteries, *J. Sol. State Chem.* **2021**, *302*, 122348.
